# Supplementary material for: Evolution of the Bovine TLR Gene Family and Member Associations with Mycobacterium avium Subspecies paratuberculosis Infection
Source: PLoS One. 2011 Nov 30;6(11):e27744. doi: 10.1371/journal.pone.0027744 (PMC3227585; doi:10.1371/journal.pone.0027744)
Supplement: Table S1 — TLR Amplicon Normalization (XLSX). (XLSX) [file pone.0027744.s002.xlsx]

## Sheet: Normalize Calculation
Table S1 Normalization Protocol with Calculations
Amplicon	Size(BP)	Mean	Difference	Adjust	% Diff	Adjust	Add ul
TLR1-1	470	624.944	154.944	Yes	0.247932	1.50414	1.5 ul
TLR1-2	890	624.944	-265.056	Yes	0.424128	2.84826	2.85 ul
TLR2-1	816	624.944	-191.056	Yes	0.305718	2.61144	2.61 ul
TLR2-2	668	624.944	-43.0563				2.0 ul
TLR2-3	681	624.944	-56.0563	Yes	0.0896982	2.1794	2.18 ul
TLR2-4	774	624.944	-149.056	Yes	0.238512	2.47702	2.48 ul
TLR2-5	730	624.944	-105.056	Yes	0.168105	2.33621	2.34ul
TLR2-6	436	624.944	188.944	Yes	0.302337	1.39533	1.4 ul
TLR3-6	598	624.944	26.9437				2.0 ul
TLR3-7	669	624.944	-44.0563				2.0 ul
TLR3-8	629	624.944	-4.05634				2.0 ul
TLR3-9	528	624.944	96.9437	Yes	0.155124	1.68975	1.69 ul
TLR3-10	527	624.944	97.9437	Yes	0.156724	1.68655	1.69 ul
TLR3-11	597	624.944	27.9437				2.0 ul
TLR3-12	612	624.944	12.9437				2.0 ul
TLR3-14	636	624.944	-11.0563				2.0 ul
TLR3-15	641	624.944	-16.0563				2.0 ul
TLR3-16	701	624.944	-76.0563	Yes	0.121701	2.2434	2.24 ul
TLR3-17	635	624.944	-10.0563				2.0 ul
TLR3-18	577	624.944	47.9437				2.0 ul
TLR3-19	590	624.944	34.9437				2.0 ul
TLR3-20	518	624.944	106.944	Yes	0.171125	1.65775	1.65 ul
TLR3-22	509	624.944	115.944	Yes	0.185527	1.62895	1.63 ul
TLR3-23	437	624.944	187.944	Yes	0.300737	1.39853	1.40 ul
TLR4-1	288	624.944	336.944	Yes	0.539158	0.921683	0.92 ul
TLR4-2	384	624.944	240.944	Yes	0.385545	1.22891	1.22 ul
TLR4-3	486	624.944	138.944	Yes	0.22233	1.55534	1.55 ul
TLR4-4	508	624.944	116.944	Yes	0.187127	1.62575	1.63 ul
TLR4-5	541	624.944	83.9437	Yes	0.134322	1.73136	1.73 ul
TLR4-6	539	624.944	85.9437	Yes	0.137522	1.72496	1.72 ul
TLR4-7	554	624.944	70.9437	Yes	0.11352	1.77296	1.77 ul
TLR4-8	533	624.944	91.9437	Yes	0.147123	1.70575	1.70 ul
TLR4-9	535	624.944	89.9437	Yes	0.143923	1.71215	1.71 ul
TLR5-1	642	624.944	-17.0563				2.0 ul
TLR5-2	661	624.944	-36.0563				2.0 ul
TLR5-3	563	624.944	61.9437	Yes	0.0991188	1.80176	1.80 ul
TLR5-4	541	624.944	83.9437	Yes	0.134322	1.73136	1.73 ul
TLR5-5	687	624.944	-62.0563	Yes	0.0992991	2.1986	2.20 ul
TLR5-6	700	624.944	-75.0563	Yes	0.120101	2.2402	2.24 ul
TLR5-8	592	624.944	32.9437				2.0 ul
TLR5-9	541	624.944	83.9437	Yes	0.134322	1.73136	1.73 ul
TLR5-10FixR	764	624.944	-139.056	Yes	0.22251	2.44502	2.45 ul
TLR6-1	876	624.944	-251.056	Yes	0.401726	2.80345	2.80 ul
TLR6-2	805	624.944	-180.056	Yes	0.288116	2.57623	2.58 ul
TLR6-3	845	624.944	-220.056	Yes	0.352122	2.70424	2.70 ul
TLR6-4	604	624.944	20.9437				2.0 ul
TLR7-1	715	624.944	-90.0563	Yes	0.144103	2.28821	2.29 ul
TLR7-2	851	624.944	-226.056	Yes	0.361723	2.72345	2.72 ul
TLR7-3	892	624.944	-267.056	Yes	0.427329	2.85466	2.85 ul
TLR7-4	822	624.944	-197.056	Yes	0.315319	2.63064	2.63 ul
TLR7-5	871	624.944	-246.056	Yes	0.393726	2.78745	2.79 ul
TLR7-6	669	624.944	-44.0563				2.0 ul
TLR8-1	583	624.944	41.9437				2.0 ul
TLR8-2	659	624.944	-34.0563				2.0 ul
TLR8-3	601	624.944	23.9437				2.0 ul
TLR8-4	592	624.944	32.9437				2.0 ul
TLR8-6	526	624.944	98.9437	Yes	0.158324	1.68335	1.68 ul
TLR8-7	665	624.944	-40.0563				2.0 ul
TLR9-1	413	624.944	211.944	Yes	0.33914	1.32172	1.32 ul
TLR9-2	414	624.944	210.944	Yes	0.33754	1.32492	1.32 ul
TLR9-3	565	624.944	59.9437	Yes	0.0959185	1.80816	1.80 ul
TLR9-4	537	624.944	87.9437	Yes	0.140723	1.71855	1.72 ul
TLR9-5	499	624.944	125.944	Yes	0.201528	1.59694	1.60 ul
TLR9-6	718	624.944	-93.0563	Yes	0.148904	2.29781	2.30 ul
TLR9-7	651	624.944	-26.0563				2.0 ul
TLR9-8	546	624.944	78.9437	Yes	0.126321	1.74736	1.75 ul
TLR9-9	428	624.944	196.944	Yes	0.315138	1.36972	1.37 ul
TLR9-10	837	624.944	-212.056	Yes	0.339321	2.67864	2.68 ul
TLR10-2	768	624.944	-143.056	Yes	0.228911	2.45782	2.46 ul
TLR10-3	623	624.944	1.94366				2.0 ul
TLR10-6	868	624.944	-243.056	Yes	0.388925	2.77785	2.78 ul
Average	624.944	624.944
Median	604
Stand Dev	134.957
Half Stand Dev	67.4785
	Edges
Left	Right
489.987	759.901

## Sheet: Dilute Instructions
Amplicon	Size(BP)	Add ul			Mean
TLR1-1	470	1.5 ul			624.944
TLR1-2	890	2.85 ul
TLR2-1	816	2.61 ul
TLR2-2	668	2.0 ul
TLR2-3	681	2.18 ul
TLR2-4	774	2.48 ul
TLR2-5	730	2.34ul
TLR2-6	436	1.4 ul
TLR3-6	598	2.0 ul
TLR3-7	669	2.0 ul
TLR3-8	629	2.0 ul
TLR3-9	528	1.69 ul
TLR3-10	527	1.69 ul
TLR3-11	597	2.0 ul
TLR3-12	612	2.0 ul
TLR3-14	636	2.0 ul
TLR3-15	641	2.0 ul
TLR3-16	701	2.24 ul
TLR3-17	635	2.0 ul
TLR3-18	577	2.0 ul
TLR3-19	590	2.0 ul
TLR3-20	518	1.65 ul
TLR3-22	509	1.63 ul
TLR3-23	437	1.40 ul
TLR4-1	288	0.92 ul
TLR4-2	384	1.22 ul
TLR4-3	486	1.55 ul
TLR4-4	508	1.63 ul
TLR4-5	541	1.73 ul
TLR4-6	539	1.72 ul
TLR4-7	554	1.77 ul
TLR4-8	533	1.70 ul
TLR4-9	535	1.71 ul
TLR5-1	642	2.0 ul
TLR5-2	661	2.0 ul
TLR5-3	563	1.80 ul
TLR5-4	541	1.73 ul
TLR5-5	687	2.20 ul
TLR5-6	700	2.24 ul
TLR5-8	592	2.0 ul
TLR5-9	541	1.73 ul
TLR5-10FixR	764	2.45 ul
TLR6-1	876	2.80 ul
TLR6-2	805	2.58 ul
TLR6-3	845	2.70 ul
TLR6-4	604	2.0 ul
TLR7-1	715	2.29 ul
TLR7-2	851	2.72 ul
TLR7-3	892	2.85 ul
TLR7-4	822	2.63 ul
TLR7-5	871	2.79 ul
TLR7-6	669	2.0 ul
TLR8-1	583	2.0 ul
TLR8-2	659	2.0 ul
TLR8-3	601	2.0 ul
TLR8-4	592	2.0 ul
TLR8-6	526	1.68 ul
TLR8-7	665	2.0 ul
TLR9-1	413	1.32 ul
TLR9-2	414	1.32 ul
TLR9-3	565	1.80 ul
TLR9-4	537	1.72 ul
TLR9-5	499	1.60 ul
TLR9-6	718	2.30 ul
TLR9-7	651	2.0 ul
TLR9-8	546	1.75 ul
TLR9-9	428	1.37 ul
TLR9-10	837	2.68 ul
TLR10-2	768	2.46 ul
TLR10-3	623	2.0 ul
TLR10-6	868	2.78 ul
