# Supplementary material for: Evolution of the Bovine TLR Gene Family and Member Associations with Mycobacterium avium Subspecies paratuberculosis Infection
Source: PLoS One. 2011 Nov 30;6(11):e27744. doi: 10.1371/journal.pone.0027744 (PMC3227585; doi:10.1371/journal.pone.0027744)
Supplement: Table S2 — Validated SNPs and Indels (XLSX). (XLSX) [file pone.0027744.s003.xlsx]

## Sheet: Sheet1
Table S2 Validated SNPs and Indels
Gene_SNP or Indel	Variation	BTA	dbSNP	Nonsynonymous	MAF all	MAF taurus
TLR1_A42G	A/G	6	rs55617254	X	0.01	0.004
TLR1_G77A	G/A	6	ss469376045	X	0.002	0
TLR1_G363A	G/A	6	rs55617441		0.002	0
TLR1_C603T	C/T	6	rs43702940		0.455	0.434
TLR1_G1521A	G/A	6	rs55617193		0.43	0.43
TLR2_A9163G	A/G	18	rs68343161		0.014	0
TLR2_-9214TG	-/TG	18	rs68268241		0.065	0.039
TLR2_A9399G	A/G	18	ss470256470		0.003	0.002
TLR2_G9416A	G/A	18	ss470256472		0.002	0.002
TLR2_G9431A	G/A	18	rs68343163a		0.001	0.001
TLR2_C9564T	C/T	18	rs68268245		0.177	0.185
TLR2_C9570T	C/T	18	ss470256473		0.003	0.001
TLR2_G9579A	A/G	18	rs68343166		0.046	0.04
TLR2_A9589C	A/C	18	rs68268246		0.066	0.041
TLR2_G9644A	G/A	18	ss470256474		0.001	0.001
TLR2_C9708T	C/T	18	rs68268248		0.069	0.043
TLR2_G10018A	G/A	18	ss470256475	X	0.004	0.004
TLR2_C10047T	C/T	18	ss470256476a		0.002	0.001
TLR2_C10077T	C/T	18	ss470256477		0.004	0.004
TLR2_T10095C	C/T	18	rs68268249		0.068	0.042
TLR2_G10098T	G/T	18	rs55617172	X	0.337	0.318
TLR2_G10111A	A/G	18	rs68268250	X	0.056	0.039
TLR2_G10265T	G/T	18	ss470256478	X	0.008	0.003
TLR2_G10364A	A/G	18	rs43706434	X	0.171	0.178
TLR2_G10511A	G/A	18	ss470256479	X	0.158	0.167
TLR2_A10540G	A/G	18	rs43706433	X	0.338	0.316
TLR2_T10590A	A/T	18	rs68268251	X	0.015	0
TLR2_C10841A	G/T	18	ss470256481	X	0.006	0.007
TLR2_G10854T	G/T	18	rs68268253		0.048	0.041
TLR2_T10887A	A/T	18	rs68343167	X	0.067	0.041
TLR2_G10919A	A/G	18	rs68343168	X	0.067	0.041
TLR2_A10938C	A/C	18	rs68268254		0.003	0
TLR2_A11117G	A/G	18	ss470256482	X	0.004	0.004
TLR2_C11123T	C/T	18	rs68268255	X	0.005	0
TLR2_A11159G	A/G	18	rs68268256	X	0.071	0.044
TLR2_A11217C	A/C	18	rs68268257		0.068	0.041
TLR2_C11363T	C/T	18	ss470256483	X	0.015	0.016
TLR2_T11413G	G/T	18	rs68268258	X	0.005	0
TLR2_T11541C	C/T	18	rs68268259		0.15	0.159
TLR2_G11597A	A/G	18	rs68268260	X	0.066	0.039
TLR2_T11616C	C/T	18	rs41830058		0.235	0.216
TLR2_C11723T	C/T	18	rs68343170	X	0.01	0
TLR2_C11748T	C/T	18	rs68268262		0.003	0
TLR2_C11904G	C/G	18	rs68268263	X	0.068	0.042
TLR2_T11934C	C/T	18	rs68343171		0.068	0.041
TLR2_T11964C	C/T	18	rs68268264		0.068	0.041
TLR2_G12033C	C/G	18	rs68268265		0.005	0.003
TLR2_G12121C	G/C	18	ss470256484a	X	0.001	0
TLR2_G12123A	A/G	18	rs68268266		0.068	0.041
TLR2_C12204T	C/T	18	rs68268267		0.066	0.04
TLR3_A580G	A/G	27	rs42851894		0.484	0.485
TLR3_A697G	A/G	27	rs42851895		0.438	0.5
TLR3_A739T	A/T	27	rs42851896		0.281	0.338
TLR3_T746C	T/C	27	rs42851897		0.409	0.31
TLR3_G753A	G/A	27	rs42851898		0.453	0.485
TLR3_C764T	C/T	27	rs55617276		0.255	0.3
TLR3_G835A	G/A	27	rs55617196		0.011	0
TLR3_C961T	C/T	27	rs55617242		0.01	0
TLR3_A1152G	A/G	27	rs55617217		0.01	0
TLR3_A1285C	A/C	27	rs42851900		0.271	0.323
TLR3_T1315C	T/C	27	rs42851901		0.284	0.336
TLR3_G1565A	G/A	27	rs55617186		0.068	0
TLR3_G2042T	G/T	27	rs42851909		0.284	0.336
TLR3_C2060T	C/T	27	rs42851910		0.279	0.331
TLR3_G2107T	G/T	27	rs42851911		0.279	0.336
TLR3_G2185A	G/A	27	rs42851912		0.411	0.328
TLR3_G2509A	G/A	27	rs42851914		0.268	0.3
TLR3_T2512A	T/A	27	rs55617216		0.089	0
TLR3_G2608C	G/C	27	rs42851915		0.286	0.331
TLR3_T2750C	T/C	27	ss469376047		0.016	0
TLR3_A3081G	A/G	27	rs55617184		0.094	0.008
TLR3_T3344C	T/C	27	rs55617229		0.41	0.325
TLR3_G3345A	G/A	27	ss469376049		0.016	0.023
TLR3_C3381G	C/G	27	rs55617207		0.089	0
TLR3_C3435A	C/A	27	rs55617345		0.279	0.331
TLR3_T3458C	T/C	27	ss469376051		0.021	0
TLR3_A3610G	A/G	27	rs55617271		0.089	0
TLR3_T3624C	T/C	27	ss469376053a		0.005	0
TLR3_G3741A	A/G	27	rs55617234		0.068	0
TLR3_C3762G	C/G	27	rs42851919		0.279	0.336
TLR3_G3804A	G/A	27	ss469376055a		0.005	0
TLR3_T3954C	T/C	27	rs42851920		0.279	0.336
TLR3_G4086A	T/C	27	rs42851921		0.281	0.338
TLR3_T4328C	T/C	27	rs55617462		0.057	0.062
TLR3_C4332T	C/T	27	rs55617278		0.266	0.32
TLR3_C4633T	C/T	27	rs42851922		0.281	0.331
TLR3_G4783A	G/A	27	ss469376057		0.274	0.331
TLR3_G5201A	G/A	27	ss469376059a		0.005	0.008
TLR3_G5304A	G/A	27	rs42851924		0.234	0.277
TLR3_C5350T	C/T	27	rs42851925		0.197	0.23
TLR3_C5765G	C/G	27	rs55617222		0.135	0.008
TLR3_A6281G	A/G	27	rs42851929		0.25	0.312
TLR3_C6382A	C/A	27	ss469376061a		0.005	0
TLR3_C6707T	C/T	27	rs42852432		0.302	0.385
TLR3_T7039G	T/G	27	rs42852435		0.453	0.392
TLR3_A8009G	A/G	27	rs55617204	X	0.021	0
TLR3_G8270A	G/A	27	rs55617272	X	0.058	0.055
TLR3_A8902G	A/G	27	rs42852438		0.426	0.385
TLR3_G8985T	G/T	27	rs42852439	X	0.432	0.385
TLR3_G9079A	G/A	27	rs42852440		0.312	0.385
TLR3_A9586G	A/G	27	rs42852441		0.302	0.385
TLR3_C9704T	C/T	27	rs55617164		0.12	0
TLR3_G9739A	G/A	27	rs55617241		0.229	0.292
TLR3_C10467T	C/T	27	rs55617451		0.286	0.346
TLR3_C10848A	C/A	27	rs55617344		0.078	0
TLR3_A10859C	A/C	27	rs55617353		0.422	0.454
TLR4_G374A	G/A	8	ss469376063		0.004	0.003
TLR4_A534C	A/C	8	rs8193042		0.033	0.023
TLR4_C539A	C/A	8	rs8193043		0.005	0
TLR4_T545C	T/C	8	rs8193044		0.012	0.001
TLR4_T610C	T/C	8	ss469376065		0.109	0.113
TLR4_T5054G	T/G	8	rs8193045		0.017	0.001
TLR4_C5086T	T/C	8	ss470682348		0.03	0.031
TLR4_A5088G	G/A	8	rs8193046		0.497	0.488
TLR4_G5135A	G/A	8	rs8193047		0.015	0.001
TLR4_G8000A	G/A	8	ss469376069		0.498	0.486
TLR4_C8166T	C/T	8	ss469376071a		0.001	0
TLR4_A8219C	A/C	8	rs8193049	X	0.009	0.004
TLR4_C8807A	C/A	8	rs8193053	X	0.005	0.001
TLR4_A8886G	A/G	8	rs8193054		0.021	0.002
TLR4_A8909G	A/G	8	rs8193055	X	0.005	0.002
TLR4_T8934G	T/G	8	rs8193057		0.016	0
TLR4_A9288G	A/G	8	rs8193059		0.022	0.001
TLR4_C9423T	T/C	8	rs8193060		0.356	0.346
TLR4_A9463C	A/C	8	ss469376073	X	0.003	0.002
TLR4_A9527G	A/G	8	ss469376075	X	0.003	0.002
TLR4_T9534C	T/C	8	rs8193061		0.007	0
TLR4_T9594C	T/C	8	rs8193062		0.005	0.001
TLR4_G9715A	G/A	8	rs8193066	X	0.008	0.002
TLR4_C9759A	C/A	8	rs8193067		0.004	0.001
TLR4_C9788T	C/T	8	rs8193069	X	0.107	0.107
TLR4_T9795C	T/C	8	rs8193070		0.01	0
TLR4_C9990T	C/T	8	ss469376077		0.002	0.001
TLR4_T10308C	T/C	8	rs8193071		0.003	0.003
TLR5_C159A	C/A	16	rs55617268		0.385	0.364
TLR5_A314G	A/G	16	rs55617159		0.388	0.366
TLR5_C322T	C/T	16	rs55617368		0.361	0.363
TLR5_365Y	T/C	16	rs55617149		0.015	0.002
TLR5_-374C	-/C	16	rs55617312		0.378	0.362
TLR5_C580T	C/T	16	rs55617365		0.386	0.364
TLR5_C584T	C/T	16	rs55617173		0.386	0.364
TLR5_-628CTCCTTCTGATCAGCTGTAAATTGT	-/25bp	16	rs55617435		0.386	0.371
TLR5_T753G	T/G	16	ss469376079		0.006	0.001
TLR5_T788G	T/G	16	ss469376081		0.005	0
TLR5_G1137C	G/C	16	rs55617208		0.38	0.363
TLR5_T1163C	T/C	16	ss469376083		0.006	0.001
TLR5_G1189T	G/T	16	rs55617262		0.381	0.364
TLR5_C1254T	C/T	16	rs55617167		0.381	0.364
TLR5_-1369C	-/C	16	rs55617256		0.28	0.279
TLR5_C1498T	C/T	16	rs55617141		0.006	0.001
TLR5_C1562T	C/T	16	ss469376085a		0.006	0.006
TLR5_G1598T	G/T	16	rs55617358		0.006	0.001
TLR5_G1650A	G/A	16	rs55617432		0.386	0.365
TLR5_G1685A	G/A	16	ss469376087a		0.001	0.001
TLR5_G1687A	G/A	16	ss469376089		0.005	0
TLR5_A1778G	A/G	16	ss469376091		0.004	0.003
TLR5_A1865C	A/C	16	ss469376093		0.005	0.005
TLR5_G2135A	G/A	16	ss469376095	X	0.008	0.002
TLR5_A2326G	A/G	16	ss469376097	X	0.004	0.004
TLR5_C2332T	C/T	16	ss469376099	Putative Nonsense	0.052	0.054
TLR5_A2463G	A/G	16	rs55617233		0.016	0.003
TLR5_A2500G	A/G	16	rs55617168	X	0.016	0.003
TLR5_G2744A	G/A	16	ss469376101	X	0.004	0.003
TLR5_C2964T	C/T	16	ss469376103		0.005	0
TLR5_C3090T	C/T	16	rs55617142		0.006	0.001
TLR5_T3720C	T/C	16	rs55617187		0.385	0.364
TLR5_T3726C	T/C	16	ss469376105		0.004	0.002
TLR5_C3888G	C/G	16	ss469376107	X	0.003	0.003
TLR5_C3897T	C/T	16	rs55617178		0.004	0.003
TLR5_G3934A	G/A	16	rs55617251	X	0.006	0.001
TLR5_T3994C	T/C	16	ss469376109	X	0.016	0.002
TLR5_G4167C	G/C	16	rs55617161		0.023	0.003
TLR5_G4419A	G/A	16	rs55617337		0.413	0.424
TLR5_G4483A	G/A	16	rs55617166	X	0.007	0.001
TLR5_A4580G	A/G	16	rs55617176		0.359	0.362
TLR5_C4846T	C/T	16	rs55617200		0.023	0.003
TLR5_G4979C	G/C	16	rs55617158		0.359	0.362
TLR5_G4988A	G/A	16	rs55617177		0.01	0.005
TLR5_G5150A	G/A	16	rs55617322		0.358	0.361
TLR5_A5199G	A/G	16	rs55617240		0.006	0.001
TLR6_T14066G	T/G	6	rs68268270	X	0.003	0
TLR6_A14121G	A/G	6	rs68268271		0.029	0.003
TLR6_A14197G	A/G	6	rs68268272	X	0.017	0.001
TLR6_G14578A	G/A	6	rs43702941	X	0.365	0.355
TLR6_G14589A	G/A	6	rs68268273		0.028	0.003
TLR6_C15060T	C/T	6	rs68268274		0.071	0.073
TLR6_A15121G	A/G	6	rs68268275	X	0.025	0.003
TLR6_G15138A	G/A	6	ss469376111		0.006	0
TLR6_T15213C	T/C	6	rs68268276		0.03	0.003
TLR6_C15312T	C/T	6	rs68268277		0.009	0
TLR6_T15418A	T/A	6	ss469376113	X	0.024	0.026
TLR6_C15492T	C/T	6	ss469376115		0.058	0.061
TLR6_C15555G	C/G	6	rs68343176	X	0.019	0.003
TLR6_C15753T	C/T	6	rs68268280		0.357	0.364
TLR6_A15966G	A/G	6	rs68343178		0.022	0.003
TLR7_T301C	T/C	X	rs55617449		0.104	0.108
TLR7_G390A	G/A	X	ss469376117		0.062	0.092
TLR7_C475T	C/T	X	rs55617377		0.438	0.492
TLR7_C527T	C/T	X	rs55617163		0.115	0.123
TLR7_A607G	A/G	X	ss469376119		0.104	0.108
TLR7_C868T	C/T	X	rs55617433		0.115	0.123
TLR7_A1360G	A/G	X	ss469376121		0.01	0.015
TLR7_A1878G	A/G	X	ss469376123	X	0.021	0.031
TLR7_C2260G	C/G	X	ss469376125		0.062	0.077
TLR7_G3820A	G/A	X	rs55617323		0.042	0.031
TLR7_G3863C	G/C	X	rs55617439		0.106	0.109
TLR7_G3938C	G/C	X	rs29012404		0.292	0.369
TLR7_G3971A	G/A	X	ss469376127		0.062	0.077
TLR7_G4072A	G/A	X	ss469376129		0.062	0.077
TLR7_G4176C	G/C	X	ss469376131		0.104	0.108
TLR8_C400G	C/G	X	rs55617249		0.292	0.2
TLR8_C1027G	G/C	X	rs55617319		0.438	0.462
TLR8_A1247C	A/C	X	ss469376133		0.432	0.469
TLR8_C1408T	C/T	X	rs55617165		0.438	0.462
TLR8_T1415C	T/C	X	rs55617354	X	0.436	0.453
TLR8_A1500T	A/T	X	rs55617174	X	0.438	0.462
TLR8_A1523C	A/C	X	rs55617259	X	0.438	0.462
TLR8_C1594A	C/A	X	rs55617145	X	0.438	0.462
TLR8_G1800A	G/A	X	rs55617351	X	0.438	0.462
TLR8_G1845A	G/A	X	ss469376135	X	0.292	0.369
TLR8_C2686A	C/A	X	rs55617390	X	0.438	0.462
TLR8_A3078C	A/C	X	ss469376137	X	0.01	0.015
TLR8_G3606A	G/A	X	ss469376139		0.458	0.462
TLR9_G149A	A/G	22	rs55617357		0.421	0.422
TLR9_G201C	G/C	22	ss469376141		0.003	0.003
TLR9_T258C	T/C	22	ss469376143		0.002	0
TLR9_G367A	G/A	22	ss469376145		0.002	0.002
TLR9_G398A	G/A	22	ss469376147		0.002	0.002
TLR9_G713C	G/C	22	rs55617314		0.003	0.002
TLR9_A945G	A/G	22	rs55617138		0.425	0.441
TLR9_G1174A	G/A	22	ss469376149		0.005	0.004
TLR9_T1349C	T/C	22	rs42015526b		0.421	0.422
TLR9_G1401A	G/A	22	ss469376151		0.404	0.422
TLR9_C1561T	C/T	22	rs42015525b		0.146	0.134
TLR9_C2418A	C/A	22	ss469376153		0.003	0.002
TLR9_G2700A	G/A	22	rs55617140		0.425	0.441
TLR9_C2788T	C/T	22	ss469376155	X	0.43	0.445
TLR9_G2822A	G/A	22	rs55617258	X	0.421	0.436
TLR9_G2945A	G/A	22	ss469376157	X	0.005	0.002
TLR9_A3156G	A/G	22	ss469376159		0.423	0.439
TLR9_A3264G	A/G	22	rs55617255		0.424	0.439
TLR9_G3474C	G/C	22	rs42015524		0.41	0.414
TLR9_T4050C	T/C	22	ss469376161		0.429	0.444
TLR9_G4095A	G/A	22	rs55617221		0.406	0.424
TLR9_G4377A	G/A	22	rs55617220		0.003	0.002
TLR10_T71C	T/C	6	rs55617310	X	0.03	0.005
TLR10_G117A	G/A	6	rs55617437	X	0.018	0.003
TLR10_C361A	C/A	6	rs55617269	X	0.013	0.002
TLR10_C414A	C/A	6	rs55617137	X	0.013	0.002
TLR10_C466G	C/G	6	rs55617286	X	0.013	0.002
TLR10_A475G	A/G	6	rs55617206		0.018	0.008
TLR10_T617C	T/C	6	rs55617348		0.013	0.002
TLR10_C697A	C/A	6	rs55617155		0.001	0
TLR10_T723C	T/C	6	rs55617455	X	0.013	0.002
TLR10_T774A	T/A	6	rs55617325	X	0.427	0.442
TLR10_C776G	C/G	6	ss469376163	X	0.002	0
TLR10_T865C	T/C	6	ss469376165		0.01	0.009
TLR10_G904A	G/A	6	rs55617387		0.065	0.068
TLR10_A956T	A/T	6	rs55617197	X	0.016	0.005
TLR10_A1022G	A/G	6	rs55617324	X	0.032	0.008
TLR10_A1100G	A/G	6	rs55617311	X	0.018	0.003
TLR10_C1132T	C/T	6	rs55617152		0.006	0.001
TLR10_T1186C	T/C	6	rs55617131		0.006	0
TLR10_G1237A	G/A	6	rs55617298		0.081	0.081
TLR10_C1262T	C/T	6	rs55617266		0.018	0.004
TLR10_A2035G	A/G	6	rs55617153		0.019	0.006
TLR10_A2322C	A/C	6	rs55617297	X	0.01	0.005
TLR10_G2352A	G/A	6	rs55617343	X	0.012	0
TLR10_G3266A	G/A	6	rs55617308		0.003	0.003
TLR10_C3395T	C/T	6	rs55617336		0.016	0
TLR10_A3691G	A/G	6	ss469376167		0.016	0.003
TLR10_C3698A	C/A	6	ss469376169		0.013	0
TLR10_T3702C	T/C	6	ss469376171		0.014	0
TLR10_G3704A	G/A	6	rs55617227		0.021	0.002
TLR10_C3756A	C/T	6	rs55617328		0.022	0.006
TLR10_G3788A	G/A	6	rs55617457		0.031	0.002
TLR10_C3819T	C/T	6	ss469376173		0.02	0.007
TLR10_C3885T	C/T	6	rs55617156		0.012	0.002
TLR10_C3893G	C/G	6	ss469376175		0.017	0.018
TLR10_T3908A	T/A	6	rs55617212		0.031	0.002
Totals	280			72
a indicates that this SNP could not be placed on a discrete haplotype with best-pair phase probability ≥ 0.90
b indicates that genotypes for these SNPs are represented by the reverse complement in the raw data file, which is simply a function of assay design and SNP calling
