# Supplementary material for: Evolution of the Bovine TLR Gene Family and Member Associations with Mycobacterium avium Subspecies paratuberculosis Infection
Source: PLoS One. 2011 Nov 30;6(11):e27744. doi: 10.1371/journal.pone.0027744 (PMC3227585; doi:10.1371/journal.pone.0027744)
Supplement: Table S3 — TagSNPs and Indels (XLSX). (XLSX) [file pone.0027744.s004.xlsx]

## Sheet: Sheet1
Table S3 Tag SNPs and Indels
Gene	tagSNP/Indel all cattle	Total Alleles Captured all cattle	tagSNP/Indel taurus	Total Alleles captured taurus
TLR1	rs55617254	5 of 5 (100%) with these 4 tags	rs55617254	3 of 3 (100%) with these 2 tags
	ss469376045		rs43702940
	rs55617441
	rs43702940
TLR2	rs68268241	45 of 45 (100%) with these 24 tags	ss470256470	37 of 37 (100%) with these 17 tags
	ss470256470		ss470256472
	ss470256472		rs68343163
	rs68268245		rs68268245
	ss470256473		ss470256473
	rs68343166		ss470256474
	ss470256474		rs68268248
	ss470256475		ss470256475
	ss470256476		ss470256477
	ss470256477		ss470256478
	ss470256478		rs43706434
	rs43706434		rs43706433
	rs43706433		ss470256481
	rs68268251		ss470256482
	ss470256481		ss470256483
	ss470256482		rs41830058
	rs68268255		rs68268265
	ss470256483
	rs68268258
	rs41830058
	rs68343170
	rs68268262
	rs68268265
	ss470256484
TLR3	rs42851894	56 of 56 (100%) with these 29 tags	rs42851896	40 of 40 (100%) with these 15 tags
	rs42851895		rs42851898
	rs42851896		rs55617276
	rs42851897		rs55617184
	rs55617276		rs55617229
	rs55617242		ss469376049
	rs42851912		rs55617462
	ss469376047		ss469376059
	rs55617184		rs42851924
	ss469376049		rs42851925
	ss469376051		rs55617222
	ss469376053		rs42852435
	rs55617234		rs55617272
	ss469376055		rs55617241
	rs55617462		rs55617353
	ss469376057
	ss469376059
	rs42851924
	rs42851925
	rs55617222
	ss469376061
	rs42852435
	rs55617204
	rs55617272
	rs55617164
	rs55617241
	rs55617451
	rs55617344
	rs55617353
TLR4	ss469376063	28 of 28 (100%) with these 25 tags	ss469376063	23 of 23 (100%) with these 16 tags
	rs8193042		rs8193042
	rs8193043		ss469376065
	rs8193044		rs8193045
	ss469376065		rs8193047
	rs8193045		ss469376069
	rs8193046		rs8193049
	rs8193047		rs8193054
	rs8193049		rs8193055
	rs8193053		rs8193060
	rs8193054		ss469376073
	rs8193055		ss469376075
	rs8193057		rs8193066
	rs8193059		rs8193069
	rs8193060		ss469376077
	ss469376073		rs8193071
	ss469376075
	rs8193061
	rs8193062
	rs8193066
	rs8193067
	rs8193069
	rs8193070
	ss469376077
	rs8193071
TLR5	ss469376081	46 of 46 (100%) with these 19 tags	ss469376079	43 of 43 (100%) with these 20 tags
	rs55617208		rs55617167
	rs55617256		rs55617256
	ss469376085		ss469376085
	ss469376087		ss469376087
	ss469376091		ss469376091
	ss469376093		ss469376093
	ss469376095		ss469376095
	ss469376097		ss469376097
	ss469376099		ss469376099
	rs55617233		rs55617233
	ss469376101		rs55617168
	rs55617142		ss469376101
	ss469376105		ss469376107
	ss469376107		rs55617178
	rs55617178		ss469376109
	rs55617337		rs55617337
	rs55617200		rs55617166
	rs55617177		rs55617200
			rs55617177
TLR6	rs68268270	15 of 15 (100%) with these 11 tags	rs68268271	12 of 12 (100%) with these 7 tags
	rs68268272		rs68268272
	rs43702941		rs43702941
	rs68268274		rs68268273
	rs68268275		rs68268274
	ss469376111		ss469376113
	rs68268277		ss469376115
	ss469376113
	ss469376115
	rs68343176
	rs68343178
TLR7	ss469376117	15 of 15 (100%) with these 8 tags	ss469376117	15 of 15 (100%) with these 8 tags
	rs55617377		rs55617377
	rs55617163		rs55617163
	ss469376121		ss469376121
	ss469376123		ss469376123
	ss469376125		ss469376125
	rs55617323		rs55617323
	rs29012404		rs29012404
TLR8	rs55617249	13 of 13 (100%) with these 4 tags	rs55617249	13 of 13 (100%) with these 4 tags
	rs55617354		ss469376133
	ss469376135		ss469376135
	ss469376137		ss469376137
TLR9	ss469376141	22 of 22 (100%) with these 10 tags	rs55617357	21 of 21 (100%) with these 9 tags
	ss469376143		ss469376141
	ss469376145		ss469376145
	ss469376147		ss469376147
	ss469376149		rs55617314
	rs42015526		ss469376149
	rs42015525		rs42015525
	rs55617140		ss469376157
	ss469376157		rs55617255
	rs55617220
TLR10	rs55617310	35 of 35 (100%) with these 28 tags	rs55617310	28 of 28 (100%) with these 21 tags
	rs55617437		rs55617437
	rs55617206		rs55617269
	rs55617348		rs55617206
	rs55617155		rs55617348
	rs55617455		rs55617325
	rs55617325		ss469376165
	ss469376163		rs55617387
	ss469376165		rs55617197
	rs55617387		rs55617324
	rs55617324		rs55617311
	rs55617311		rs55617152
	rs55617152		rs55617298
	rs55617131		rs55617266
	rs55617298		rs55617153
	rs55617266		rs55617297
	rs55617153		rs55617308
	rs55617297		ss469376167
	rs55617343		rs55617328
	rs55617308		ss469376173
	rs55617336		ss469376175
	ss469376171
	rs55617227
	rs55617328
	rs55617457
	ss469376173
	rs55617156
	ss469376175
Totals	162 tags	280 Total variable sites	119 Tags	235 Total variable sites
