# Supplementary material for: Evolution of the Bovine TLR Gene Family and Member Associations with Mycobacterium avium Subspecies paratuberculosis Infection
Source: PLoS One. 2011 Nov 30;6(11):e27744. doi: 10.1371/journal.pone.0027744 (PMC3227585; doi:10.1371/journal.pone.0027744)
Supplement: Table S4 — Network Node Breed Key (XLSX). (XLSX) [file pone.0027744.s005.xlsx]

## Sheet: Sheet1
Table S4 Network Node Breed Key and Frequency Data				Beef	Dairy	Dairy + Beef	Beef + Dairy	Beef Sum	Dairy Sum	Shared1	Shared2	Notes
Gene	Node	Total Frequency	Breeds
TLR1	A	469	Angus	1	1	1	1
			Beefmaster
			Belgian Blue
			Blonde d' Aquitaine
			Braford
			Brahman
			Brahmousin
			Brangus
			Braunvieh
			Brown Swiss
			Charolais
			Chianina/Chiangus
			Gelbvieh
			Hereford
			Holstein
			Limousin
			Maine-Anjou
			Nelore
			Red Angus
			Red Brangus
			Romagnola
			Salers
			Santa Gertrudis
			Senepol
			Shorthorn
			Simbrah
			Simmental Black
			Simmental Red
			Texas Longhorn
TLR1	B	16	Beefmaster		1
			Braford
			Brahman
			Holstein
			Maine-Anjou
			Nelore
			Red Brangus
			Texas Longhorn
TLR1	C	2	Brahman
TLR1	D	594	Angus	1	1	1	1
			Beefmaster
			Belgian Blue
			Blonde d' Aquitaine
			Brahman
			Brangus
			Braunvieh
			Brown Swiss
			Charolais
			Chianina/Chiangus
			Corriente
			Gelbvieh
			Hereford
			Holstein
			Maine-Anjou
			Piedmontese
			Red Angus
			Red Brangus
			Red Poll
			Romagnola
			Santa Gertrudis
			Senepol
			Shorthorn
			Simbrah
			Simmental Black
			Simmental Red
			Texas Longhorn
TLR1	E	1	Gelbvieh	1
TLR1	F	8	Brahman		1
			Nelore
			Red Brangus
			Senepol
			Simbrah
	G	2	Holstein
	H	2	Brahman
Total	8	1094	99.6357					3	4	2	2
TLR2 Network1	A	492	Angus	1	1	1	1
			Beefmaster
			Belgian Blue
			Blonde d' Aquitaine
			Braford
			Brahman
			Brahmousin
			Brangus
			Braunvieh
			Brown Swiss
			Charolais
			Chianina/Chiangus
			Gelbvieh
			Hereford
			Holstein
			Limousin
			Maine-Anjou
			Piedmontese
			Red Angus
			Red Brangus
			Red Poll
			Salers
			Santa Gertrudis
			Senepol
			Shorthorn
			Simmental Black
			Simmental Red
			Texas Longhorn
TLR2 Network1	B	189	Angus	1	1	1	1
			Beefmaster
			Charolais
			Chianina/Chiangus
			Corriente
			Holstein
			Red Brangus
			Senepol
TLR2 Network1	C	1	Holstein		1
TLR2 Network1	D	1	Angus	1
TLR2 Network1	E	2	Braunvieh		1
			Holstein
TLR2 Network1	F	1	Angus	1
TLR2 Network1	G	1	Holstein		1
TLR2 Network1	H	1	Belgian Blue
TLR2 Network1	I	1	Simmental Red	1
TLR2 Network1	J	1	Angus	1
TLR2 Network1	K	3	Chianina/Chiangus	1	1	1	1
			Holstein
			Red Angus
TLR2 Network1	L	3	Simmental Black	1
			Simmental Red
TLR2 Network1	M	4	Holstein		1
TLR2 Network1	N	10	Brahman	1	1	1	1
			Brahmousin
			Brangus
			Chianina/Chiangus
			Corriente
			Holstein
			Simmental Black
TLR2 Network1	O	11	Angus	1	1	1	1
			Charolais
			Holstein
			Red Poll
			Shorthorn
TLR2 Network1	P	90	Angus	1	1	1	1
			Beefmaster
			Blonde d' Aquitaine
			Brangus
			Braunvieh
			Brown Swiss
			Charolais
			Chianina/Chiangus
			Gelbvieh
			Holstein
			Limousin
			Maine-Anjou
			Piedmontese
			Red Brangus
			Romagnola
			Salers
			Simmental Black
			Simmental Red
			Texas Longhorn
TLR2 Network1	Q	19	Charolais	1	1	1	1
			Gelbvieh
			Holstein
			Limousin
			Romagnola
			Salers
			Shorthorn
			Simbrah
TLR2 Network1	R	163	Braunvieh	1	1	1	1
			Hereford
			Holstein
			Santa Gertrudis
TLR2 Network1	S	1	Holstein		1
TLR2 Network1	T	2	Holstein		1
TLR2 Network1	U	1	Brangus
TLR2 Network1	V	3	Brahman
TLR2 Network1	W	1	Brahman
TLR2 Network1	X	1	Santa Gertrudis
TLR2 Network1	Y	2	Brahman
TLR2 Network1	Z	1	Brahman
TLR2 Network1	AB	6	Brahman
			Brahmousin
			Nelore
			Simbrah
TLR2 Network1	AC	5	Brahman
			Nelore
			Romagnola
			Simbrah
TLR2 Network1	AD	1	Angus	1
TLR2 Network1	AE	51	Angus	1	1	1	1
			Belgian Blue
			Braford
			Brahman
			Brangus
			Braunvieh
			Brown Swiss
			Gelbvieh
			Hereford
			Holstein
			Nelore
			Red Angus
			Red Brangus
			Simbrah
			Texas Longhorn
Total	30	1068	97.2678					15	15	9	9
TLR2 Network2	A	832	Angus	1	1	1	1
			Beefmaster
			Belgian Blue
			Blonde d' Aquitaine
			Brahman
			Brahmousin
			Brangus
			Braunvieh
			Brown Swiss
			Charolais
			Chianina/Chiangus
			Corriente
			Gelbvieh
			Hereford
			Holstein
			Limousin
			Maine-Anjou
			Piedmontese
			Red Angus
			Red Brangus
			Red Poll
			Romagnola
			Salers
			Santa Gertrudis
			Senepol
			Shorthorn
			Simbrah
			Simmental Black
			Simmental Red
			Texas Longhorn
TLR2 Network2	B	1	Holstein		1
	C	15	Charolais	1	1	1	1
			Gelbvieh
			Holstein
			Salers
			Shorthorn
TLR2 Network2	D	5	Limousin	1
			Romagnola
			Simbrah
TLR2 Network2	E	3	Beefmaster		1
			Holstein
TLR2 Network2	F	1	Holstein		1
TLR2 Network2	G	165	Hereford	1	1	1	1
			Holstein
TLR2 Network2	H	2	Hereford	1
			Simbrah
TLR2 Network2	I	1	Angus	1
TLR2 Network2	J	55	Angus	1	1	1	1
			Belgian Blue
			Braford
			Brahman
			Brangus
			Braunvieh
			Brown Swiss
			Gelbvieh
			Holstein
			Nelore
			Red Angus
			Red Brangus
			Santa Gertrudis
			Simbrah
			Texas Longhorn
TLR2 Network2	K	3	Brahman
TLR2 Network2	L	4	Brahman
			Nelore
			Romagnola
TLR2 Network2	M	5	Brahman
			Brahmousin
			Nelore
			Simbrah
Total	13	1092	99.4536					7	7	4	4
TLR3 Network1	A	40	Angus	1	1	1	1
			Beefmaster
			Belgian Blue
			Blonde d' Aquitaine
			Brahmousin
			Brangus
			Braunvieh
			Brown Swiss
			Charolais
			Corriente
			Gelbvieh
			Holstein
			Limousin
			Salers
			Senepol
			Simmental Black
			Simmental Red
TLR3 Network1	B	1	Maine-Anjou
TLR3 Network1	C	2	Shorthorn		1
TLR3 Network1	D	2	Blonde d' Aquitaine
			Santa Gertrudis
TLR3 Network1	E	3	Angus	1
			Salers
TLR3 Network1	F	1	Romagnola
TLR3 Network1	G	23	Beefmaster	1	1	1	1
			Brahman
			Braunvieh
			Chianina/Chiangus
			Gelbvieh
			Holstein
			Limousin
			Piedmontese
			Romagnola
			Senepol
			Shorthorn
			Simmental Black
			Texas Longhorn
TLR3 Network1	H	1	Brangus
TLR3 Network1	I	2	Shorthorn		1
TLR3 Network1	J	5	Brown Swiss	1	1	1	1
			Gelbvieh
			Maine-Anjou
			Red Brangus
TLR3 Network1	K	32	Angus	1	1	1	1
			Braford
			Brangus
			Braunvieh
			Charolais
			Chianina/Chiangus
			Gelbvieh
			Hereford
			Holstein
			Limousin
			Maine-Anjou
			Red Angus
			Red Brangus
			Romagnola
			Simbrah
			Simmental Black
			Simmental Red
TLR3 Network1	L	16	Angus	1	1	1	1
			Charolais
			Chianina/Chiangus
			Gelbvieh
			Holstein
			Maine-Anjou
			Red Brangus
			Santa Gertrudis
			Simmental Black
			Simmental Red
TLR3 Network1	M	2	Brahman
			Simbrah
TLR3 Network1	N	17	Angus	1	1	1	1
			Beefmaster
			Belgian Blue
			Charolais
			Chianina/Chiangus
			Holstein
			Limousin
			Piedmontese
			Santa Gertrudis
			Shorthorn
			Texas Longhorn
TLR3 Network1	O	3	Brown Swiss	1	1	1	1
			Gelbvieh
			Maine-Anjou
TLR3 Network1	P	2	Brahman
			Simbrah
TLR3 Network1	Q	2	Brahman
			Brangus
TLR3 Network1	R	2	Nelore
			Simbrah
TLR3 Network1	S	1	Braford
TLR3 Network1	T	6	Braford
			Brahman
			Nelore
			Red Brangus
TLR3 Network1	U	3	Beefmaster
			Brahmousin
Total	21	166	86.4583					8	9	7	7
TLR3 Network2	A	36	Angus	1	1	1	1
			Beefmaster
			Belgian Blue
			Blonde d' Aquitaine
			Brahmousin
			Brangus
			Braunvieh
			Charolais
			Corriente
			Gelbvieh
			Hereford
			Holstein
			Maine-Anjou
			Salers
			Senepol
			Simmental Red
TLR3 Network2	B	2	Brangus	1
			Simmental Red
TLR3 Network2	C	5	Blonde d' Aquitaine		1
			Braunvieh
			Salers
			Santa Gertrudis
TLR3 Network2	D	9	Beefmaster	1	1	1	1
			Brown Swiss
			Holstein
			Limousin
			Red Angus
			Simmental Black
TLR3 Network2	E	4	Angus	1	1	1	1
			Braunvieh
			Gelbvieh
			Limousin
TLR3 Network2	F	3	Braford
			Brahman
			Nelore
	G	1	Brahman
TLR3 Network2	H	15	Beefmaster
			Braford
			Brahman
			Brahmousin
			Nelore
			Red Brangus
			Simbrah
TLR3 Network2	I	4	Brahman
			Nelore
			Simbrah
TLR3 Network2	J	2	Brahman
			Simbrah
TLR3 Network2	K	1	Brown Swiss		1
TLR3 Network2	L	93	Angus	1	1	1	1
			Beefmaster
			Belgian Blue
			Braford
			Brahman
			Brahmousin
			Brangus
			Braunvieh
			Brown Swiss
			Charolais
			Chianina/Chiangus
			Gelbvieh
			Hereford
			Holstein
			Limousin
			Maine-Anjou
			Piedmontese
			Red Angus
			Red Brangus
			Red Poll
			Romagnola
			Santa Gertrudis
			Senepol
			Shorthorn
			Simbrah
			Simmental Black
			Simmental Red
			Texas Longhorn
TLR3 Network2	M	11	Angus	1	1	1	1
			Beefmaster
			Brahman
			Chianina/Chiangus
			Holstein
			Limousin
			Piedmontese
			Red Poll
			Simbrah
			Texas Longhorn
TLR3 Network2	N	2	Brahman
			Brangus
Total	14	188	97.9167					6	7	5	5
TLR4	A	485	Angus	1	1	1	1
			Beefmaster
			Belgian Blue
			Blonde d' Aquitaine
			Braford
			Brahmousin
			Brangus
			Braunvieh
			Brown Swiss
			Charolais
			Chianina/Chiangus
			Corriente
			Gelbvieh
			Hereford
			Holstein
			Limousin
			Maine-Anjou
			Red Angus
			Red Brangus
			Romagnola
			Salers
			Santa Gertrudis
			Shorthorn
			Simmental Black
			Simmental Red
TLR4	B	2	Holstein		1
TLR4	C	1	Holstein		1
TLR4	D	1	Salers
TLR4	E	3	Beefmaster
			Holstein		1
TLR4	F	3	Beefmaster
			Brahman
			Nelore
TLR4	G	1	Simbrah
TLR4	H	1	Holstein		1
TLR4	I	1	Brahman
TLR4	J	29	Holstein		1
TLR4	K	7	Holstein		1
TLR4	L	1	Holstein		1
TLR4	M	1	Holstein		1
TLR4	N	2	Holstein		1
TLR4	O	2	Holstein		1
TLR4	P	1	Holstein		1
TLR4	Q	110	Angus	1	1	1	1
			Belgian Blue
			Brahmousin
			Brangus
			Braunvieh
			Brown Swiss
			Charolais
			Gelbvieh
			Holstein
			Limousin
			Maine-Anjou
			Piedmontese
			Red Angus
			Salers
			Shorthorn
			Simbrah
			Simmental Black
			Simmental Red
			Texas Longhorn
TLR4	R	1	Chianina/Chiangus
TLR4	S	43	Angus	1
			Beefmaster
			Brangus
			Maine-Anjou
			Red Angus
			Red Brangus
			Romagnola
			Senepol
			Simmental Black
TLR4	T	3	Brahman
			Holstein		1
TLR4	U	239	Angus	1	1	1	1
			Beefmaster
			Belgian Blue
			Blonde d' Aquitaine
			Brahmousin
			Brangus
			Braunvieh
			Brown Swiss
			Charolais
			Chianina/Chiangus
			Corriente
			Gelbvieh
			Hereford
			Holstein
			Limousin
			Maine-Anjou
			Nelore
			Piedmontese
			Red Angus
			Red Poll
			Romagnola
			Salers
			Santa Gertrudis
			Senepol
			Shorthorn
			Simmental Black
TLR4	V	108	Angus	1	1	1	1
			Braunvieh
			Gelbvieh
			Holstein
			Red Angus
			Senepol
TLR4	W	3	Holstein		1
TLR4	X	4	Holstein		1
TLR4	Y	1	Holstein		1
TLR4	Z	4	Brahman
			Nelore
			Red Brangus
			Simbrah
TLR4	AB	1	Nelore
TLR4	AC	1	Brahman
TLR4	AD	5	Beefmaster
			Braford
			Brahman
Total	29	1064	96.9035					5	19	4	4
TLR5	A	431	Angus	1	1	1	1
			Belgian Blue
			Braford
			Brahman
			Brangus
			Charolais
			Chianina/Chiangus
			Gelbvieh
			Holstein
			Limousin
			Maine-Anjou
			Red Angus
			Red Brangus
			Salers
			Santa Gertrudis
			Senepol
			Shorthorn
			Simbrah
			Simmental Red
			Texas Longhorn
TLR5	B	2	Holstein		1
TLR5	C	1	Charolais	1
TLR5	D	1	Holstein		1
TLR5	E	1	Holstein		1
TLR5	F	6	Holstein		1
TLR5	G	196	Angus	1	1	1	1
			Belgian Blue
			Braunvieh
			Brown Swiss
			Charolais
			Holstein
			Limousin
			Maine-Anjou
			Piedmontese
			Red Angus
			Senepol
			Shorthorn
			Simmental Black
			Simmental Red
			Texas Longhorn
TLR5	H	1	Holstein		1
TLR5	I	1	Holstein		1
TLR5	J	1	Holstein		1
TLR5	K	5	Holstein		1
			Red Poll
TLR5	L	4	Braunvieh		1
			Holstein
			Romagnola
TLR5	M	4	Beefmaster
			Brahman
			Nelore
TLR5	N	1	Brahman
TLR5	O	1	Holstein		1
TLR5	P	2	Holstein		1
TLR5	Q	54	Braford									Nonsense Hap
			Holstein		1
TLR5	R	228	Angus	1	1	1	1
			Beefmaster
			Braford
			Brahman
			Brahmousin
			Brangus
			Braunvieh
			Charolais
			Chianina/Chiangus
			Corriente
			Gelbvieh
			Hereford
			Holstein
			Limousin
			Maine-Anjou
			Piedmontese
			Red Angus
			Red Brangus
			Romagnola
			Shorthorn
			Simbrah
			Simmental Black
			Simmental Red
			Texas Longhorn
TLR5	S	1	Charolais	1
TLR5	T	1	Charolais	1
TLR5	U	2	Blonde d' Aquitaine		1
			Holstein
TLR5	V	2	Simmental Black	1
			Simbrah
TLR5	W	4	Blonde d' Aquitaine	1
			Charolais
			Red Poll
			Simbrah
TLR5	X	81	Chianina/Chiangus
			Holstein		1
TLR5	Y	6	Brahman
			Nelore
			Texas Longhorn
TLR5	Z	1	Brangus
TLR5	AB	9	Brahmousin
			Brangus
			Nelore
			Brahman
			Simbrah
TLR5	AC	1	Santa Gertrudis
TLR5	AD	4	Chianina/Chiangus
			Nelore
			Red Brangus
			Senepol
Total	29	1052	95.8106					8	17	3	3
TLR6	A	523	Angus	1	1	1	1
			Beefmaster
			Belgian Blue
			Blonde d' Aquitaine
			Brahman
			Brangus
			Braunvieh
			Brown Swiss
			Charolais
			Chianina/Chiangus
			Corriente
			Gelbvieh
			Hereford
			Holstein
			Maine-Anjou
			Piedmontese
			Red Angus
			Red Poll
			Romagnola
			Santa Gertrudis
			Senepol
			Shorthorn
			Simbrah
			Simmental Black
			Simmental Red
			Texas Longhorn
TLR6	B	63	Charolais	1	1	1	1
			Holstein
			Red Angus
			Red Brangus
TLR6	C	76	Angus	1	1	1	1
			Blonde d' Aquitaine
			Brahmousin
			Braunvieh
			Brown Swiss
			Charolais
			Holstein
			Limousin
			Romagnola
			Salers
			Simmental Black
			Simmental Red
			Texas Longhorn
TLR6	D	26	Angus	1	1	1	1
			Maine-Anjou
			Shorthorn
TLR6	E	339	Angus	1	1	1	1
			Beefmaster
			Belgian Blue
			Braford
			Brahmousin
			Brangus
			Braunvieh
			Brown Swiss
			Charolais
			Chianina/Chiangus
			Gelbvieh
			Hereford
			Holstein
			Limousin
			Maine-Anjou
			Red Angus
			Red Brangus
			Romagnola
			Salers
			Santa Gertrudis
			Senepol
			Shorthorn
			Simmental Black
			Texas Longhorn
TLR6	F	1	Beefmaster
	G	1	Brangus
TLR6	H	3	Brahman
TLR6	I	1	Brahman
TLR6	J	3	Braford
TLR6			Brahman
	K	2	Nelore
TLR6			Red Brangus
	L	1	Chianina/Chiangus
TLR6	M	2	Nelore
			Simbrah
TLR6	N	1	Brahman
TLR6	O	9	Beefmaster
			Brahman
			Brangus
			Red Brangus
			Senepol
			Simbrah
			Texas Longhorn
TLR6	P	1	Chianina/Chiangus
Total	16	1052	95.8106					5	5	5	5
TLR7	A	46	Angus	1	1	1	1
			Beefmaster
			Braford
			Brahman
			Brahmousin
			Brangus
			Braunvieh
			Brown Swiss
			Charolais
			Chianina/Chiangus
			Gelbvieh
			Hereford
			Holstein
			Limousin
			Maine-Anjou
			Nelore
			Piedmontese
			Red Angus
			Red Brangus
			Romagnola
			Salers
			Santa Gertrudis
			Simbrah
			Simmental Black
			Simmental Red
TLR7	B	2	Charolais	1	1	1	1
			Holstein
TLR7	C	5	Belgian Blue	1	1	1	1
			Brown Swiss
			Chianina/Chiangus
			Limousin
			Simmental Black
TLR7	D	1	Simmental Red	1
TLR7	E	28	Angus	1	1	1	1
			Beefmaster
			Belgian Blue
			Blonde d' Aquitaine
			Brangus
			Braunvieh
			Charolais
			Chianina/Chiangus
			Gelbvieh
			Hereford
			Holstein
			Maine-Anjou
			Red Angus
			Red Poll
			Salers
			Santa Gertrudis
			Senepol
			Shorthorn
			Simmental Black
TLR7	F	3	Brahman
TLR7	G	1	Shorthorn		1
TLR7	H	4	Beefmaster
			Limousin	1
			Nelore
			Senepol
TLR7	I	6	Corriente	1	1	1	1
			Red Angus
			Shorthorn
			Simbrah
			Texas Longhorn
Total	9	96	100					7	6	5	5
TLR8	A	28	Angus	1	1	1	1
			Beefmaster
			Braford
			Brahman
			Brangus
			Brown Swiss
			Charolais
			Chianina/Chiangus
			Gelbvieh
			Holstein
			Maine-Anjou
			Nelore
			Piedmontese
			Red Angus
			Red Brangus
			Romagnola
			Salers
			Santa Gertrudis
			Shorthorn
			Simbrah
			Simmental Black
			Simmental Red
TLR8	B	24	Braford	1	1	1	1
			Brahman
			Braunvieh
			Charolais
			Corriente
			Gelbvieh
			Hereford
			Holstein
			Maine-Anjou
			Red Angus
			Red Brangus
			Senepol
			Shorthorn
			Simbrah
			Texas Longhorn
TLR8	C	2	Beefmaster
			Brahman
TLR8	D	14	Belgian Blue	1	1	1	1
			Brahmousin
			Braunvieh
			Brown Swiss
			Chianina/Chiangus
			Gelbvieh
			Limousin
			Nelore
			Simmental Black
			Simmental Red
TLR8	E	27	Angus	1	1	1	1
			Beefmaster
			Belgian Blue
			Blonde d' Aquitaine
			Brangus
			Braunvieh
			Charolais
			Chianina/Chiangus
			Gelbvieh
			Hereford
			Holstein
			Maine-Anjou
			Red Angus
			Red Poll
			Salers
			Santa Gertrudis
			Senepol
			Shorthorn
			Simmental Black
TLR8	F	1	Angus	1
Total	6	96	100					5	4	4	4
TLR9	A	148	Angus	1	1	1	1
			Beefmaster
			Braford
			Brahman
			Chianina/Chiangus
			Holstein
			Nelore
			Red Angus
			Red Brangus
			Santa Gertrudis
			Senepol
			Simbrah
TLR9	B	1	Holstein		1
TLR9	C	3	Chianina/Chiangus
			Romagnola
TLR9	D	5	Brahman
			Chianina/Chiangus
			Nelore
			Texas Longhorn
TLR9	E	2	Brahman
TLR9	F	7	Brahman
			Red Brangus
			Santa Gertrudis
TLR9	G	14	Beefmaster	1	1	1	1
			Brahman
			Brahmousin
			Gelbvieh
			Holstein
			Limousin
			Maine-Anjou
			Red Angus
			Red Brangus
			Texas Longhorn
TLR9	H	444	Angus	1	1	1	1
			Beefmaster
			Belgian Blue
			Blonde d' Aquitaine
			Braford
			Brahmousin
			Brangus
			Braunvieh
			Brown Swiss
			Charolais
			Chianina/Chiangus
			Corriente
			Gelbvieh
			Hereford
			Holstein
			Limousin
			Maine-Anjou
			Piedmontese
			Red Angus
			Red Brangus
			Red Poll
			Romagnola
			Salers
			Santa Gertrudis
			Senepol
			Shorthorn
			Simbrah
			Simmental Black
			Simmental Red
			Texas Longhorn
TLR9	I	1	Holstein		1
TLR9	J	1	Holstein		1
TLR9	K	1	Charolais	1
TLR9	L	1	Limousin	1
TLR9	M	1	Holstein		1
TLR9	N	3	Angus	1	1	1	1
			Holstein
TLR9	O	1	Hereford	1
TLR9	P	436	Angus	1	1	1	1
			Beefmaster
			Belgian Blue
			Brangus
			Braunvieh
			Charolais
			Hereford
			Holstein
			Red Angus
			Salers
			Simmental Black
TLR9	Q	3	Beefmaster	1	1	1	1
			Braunvieh
			Charolais
TLR9	R	12	Belgian Blue	1	1	1	1
			Brahmousin
			Holstein
			Senepol
			Simbrah
			Simmental Black
			Simmental Red
			Texas Longhorn
TLR9	S	4	Brahman		1
			Holstein
			Shorthorn
TLR9	T	2	Corriente		1
			Holstein
Total	20	1090	99.2714					10	13	7	7
TLR10	A	390	Angus	1	1	1	1
			Beefmaster
			Belgian Blue
			Braford
			Brahmousin
			Brangus
			Braunvieh
			Brown Swiss
			Charolais
			Chianina/Chiangus
			Gelbvieh
			Hereford
			Holstein
			Limousin
			Red Angus
			Romagnola
			Salers
			Santa Gertrudis
			Senepol
			Shorthorn
			Simbrah
			Simmental Black
			Simmental Red
TLR10	B	81	Angus	1	1	1	1
			Brahman
			Brahmousin
			Braunvieh
			Brown Swiss
			Charolais
			Chianina/Chiangus
			Gelbvieh
			Holstein
			Maine-Anjou
			Piedmontese
			Romagnola
			Salers
			Shorthorn
			Simmental Black
			Texas Longhorn
TLR10	C	11	Angus	1	1	1	1
			Brangus
			Chianina/Chiangus
			Maine-Anjou
			Red Angus
			Red Brangus
			Shorthorn
			Texas Longhorn
TLR10	D	59	Holstein	1	1	1	1
			Red Angus
			Red Brangus
TLR10	E	426	Angus	1	1	1	1
			Beefmaster
			Belgian Blue
			Blonde d' Aquitaine
			Braford
			Brangus
			Braunvieh
			Brown Swiss
			Charolais
			Chianina/Chiangus
			Corriente
			Gelbvieh
			Hereford
			Holstein
			Limousin
			Maine-Anjou
			Red Angus
			Red Poll
			Salers
			Santa Gertrudis
			Senepol
			Shorthorn
			Simbrah
			Simmental Black
			Simmental Red
			Texas Longhorn
TLR10	F	10	Brahman
			Nelore
			Red Brangus
			Senepol
			Simbrah
Total	6	977	88.98					5	5	5	5
Note, 977 is the number of haplotypes derived from				84	111	60	60
nodes A-F. However, 1,048 total haplotypes were confidently reconstructed.
